# Supplementary material for: Age-Related Modifications of Electroencephalogram Coherence in Mice Models of Alzheimer’s Disease and Amyotrophic Lateral Sclerosis
Source: MDPI journal article supplement (doi:10.3390/biomedicines11041151), 2023-04-11
Supplement: s1 [file s1]

**Figure S2**

Two-way ANOVA analysis of differences between EEG coherence distributions in 5xFAD- and WT<sub>5xFAD</sub>- mice of different ages.

|                        | <b>5xFAD- vs. WT<sub>5xFAD</sub>- mice</b> |                 |                              |                 |                              |                 |                              |                 |
|------------------------|--------------------------------------------|-----------------|------------------------------|-----------------|------------------------------|-----------------|------------------------------|-----------------|
| <b>Age, months</b>     | <b>6</b>                                   |                 | <b>9</b>                     |                 | <b>12</b>                    |                 | <b>18</b>                    |                 |
| <b>Areas/Coherence</b> | <b><i>F</i><sub>138</sub></b>              | <b><i>p</i></b> | <b><i>F</i><sub>90</sub></b> | <b><i>p</i></b> | <b><i>F</i><sub>84</sub></b> | <b><i>p</i></b> | <b><i>F</i><sub>72</sub></b> | <b><i>p</i></b> |
| <i>MCsin-HPsin</i>     | 17.9                                       | <0.001          | 7.8                          | 0.006           | 11.2                         | 0.001           | 1.1                          | 0.299           |
| <i>MCsin-VTAsin</i>    | 105                                        | <0.001          | 233                          | <0.001          | 11.1                         | 0.001           | 0.3                          | 0.588           |
| <i>MCsin-SNdex</i>     | 107                                        | <0.001          | 90.7                         | <0.001          | 10.8                         | 0.002           | 3.6                          | 0.063           |
| <i>HPsin-VTAsin</i>    | 163                                        | <0.001          | 29.2                         | <0.001          | 11.5                         | 0.001           | 13.4                         | <0.001          |
| <i>HPsin-SNdex</i>     | 96.4                                       | <0.001          | 36.6                         | <0.001          | 10.9                         | 0.001           | 0.6                          | 0.440           |
| <i>VTAsin-SNdex</i>    | 46.3                                       | <0.001          | 115                          | <0.001          | 17.7                         | <0.001          | 9.4                          | 0.003           |
