# Supplementary material for: Age-Related Modifications of Electroencephalogram Coherence in Mice Models of Alzheimer’s Disease and Amyotrophic Lateral Sclerosis
Source: MDPI journal article supplement (doi:10.3390/biomedicines11041151), 2023-04-11
Supplement: s1 [file s1]

**Figure S3**

Two-way ANOVA analysis of differences between EEG coherence distributions in *FUS*- and *WT<sub>FUS</sub>*-mice of different ages

|                    | <i>FUS</i> - vs. <i>WT<sub>FUS</sub></i> - mice |          |                        |          |
|--------------------|-------------------------------------------------|----------|------------------------|----------|
| Age, months        | 2                                               |          | 5                      |          |
| Areas/Coherence    | <i>F</i> <sub>72</sub>                          | <i>p</i> | <i>F</i> <sub>66</sub> | <i>p</i> |
| <i>MCsin-Ptsin</i> | 7.3                                             | 0.008    | 5.1                    | 0.028    |
| <i>MCsin-MSdex</i> | 16.3                                            | <0.000   | 2.0                    | 0.161    |
| <i>MCsin-Ptdex</i> | 21.8                                            | <0.000   | 3.8                    | 0.056    |
| <i>Ptsin-MCdex</i> | 15.1                                            | <0.000   | 0.8                    | 0.362    |
| <i>Ptsin-Ptdex</i> | 12.7                                            | <0.000   | 3.0                    | 0.086    |
| <i>MCdex-Ptdex</i> | 23.2                                            | <0.000   | 0.9                    | 0.353    |
